# Supplementary material for: The overestimated prevalence of hypertension in a population survey: a cross-sectional study from Hebei province, China
Source: Springer Nature journal article supplement (doi:10.1186/s12872-022-02994-y), 2022-12-12

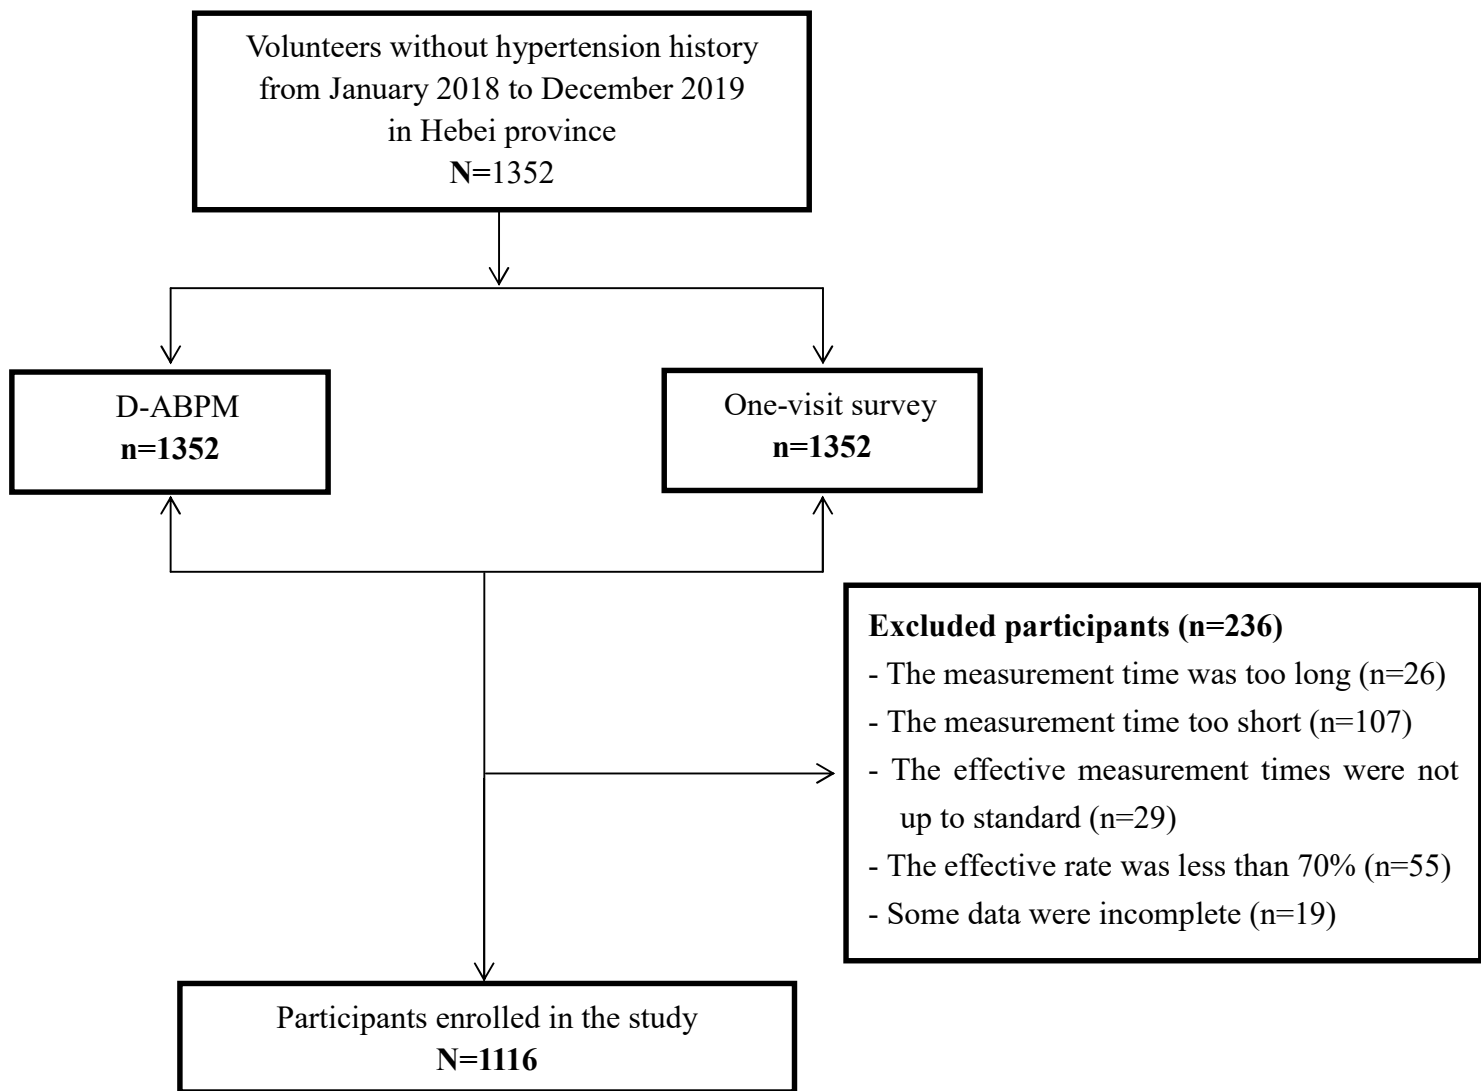

Supplement: MOESM1 [file 23816036]
